# Supplementary material
Source: Springer Nature journal article supplement (https://www.springermedizin.de/resource/supplementary/12968_2008_17_MOESM1_ESM.pdf/9577796)

**Base**

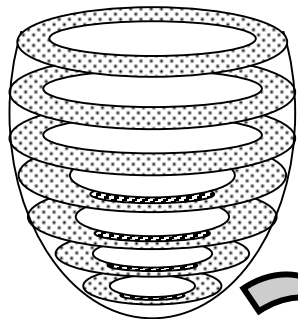

**Apex**

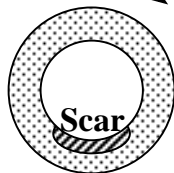

**Short-axis view**

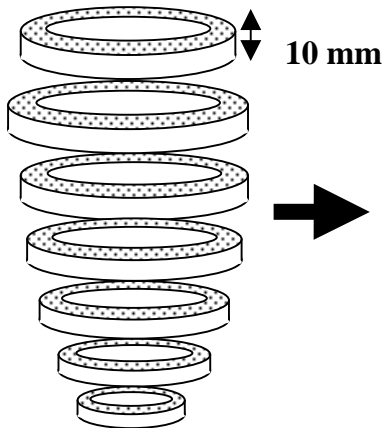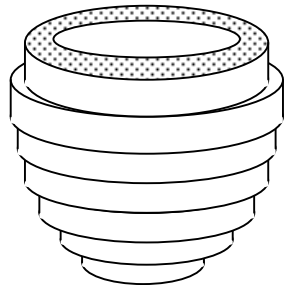

**Myocardial volume**

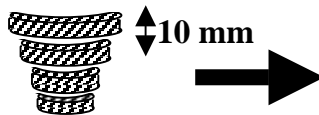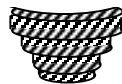

**Scar volume**

Supplement: MOESM1 [file 9577796]
